# Supplementary material for: Loss of miR-24-3p promotes epithelial cell apoptosis and impairs the recovery from intestinal inflammation
Source: PubMed Central journal article supplement (PMC8684555; doi:10.1038/s41419-021-04463-4), 2021-12-18
Supplement: 41419_2021_4463_MOESM2_ESM.pdf [file 41419_2021_4463_MOESM2_ESM.pdf]

# 1. Artin Soroosh

Re: F10 article approval

ARTIN SOROOSH <asoroosh@ucla.edu>  
Sat 11/20/2021 1:14 PM  
To: Rankin, Carl <crankin@mednet.ucla.edu>  
From: Artin Soroosh

On Tue, Nov 30, 2021, 9:40 AM Rankin, Carl <crankin@mednet.ucla.edu> wrote:  
Dear Artin, Harry, Jill and Mark

I sent this to you over the weekend but indicated the figures so it was a really large email and Artin didn't get it. I wanted to send the manuscript to you to get your approval as the figures have not changed. See below remark from the journal.

Thank you

Rob

From: Rankin, Carl <crankin@mednet.ucla.edu>  
Date: Saturday, November 27, 2021 at 9:22 AM  
To: ARTIN SOROOSH <asoroosh@ucla.edu>; Fang, Kai <kifang@mednet.ucla.edu>; Jillmayhoffman@gmail.com <jillmayhoffman@gmail.com>; KaiMan.Law@kq.org <KaiMan.Law@kq.org>; Videlock, Elizabeth J. <Evidelock@mednet.ucla.edu>; allok97@gmail.com <allok97@gmail.com>; Jonathan.Zhao <jonathan.zhao2000@gmail.com>; Hamid, Sepehr <SHamidi@mednet.ucla.edu>; David.Padua <davidpadua@gmail.com>; Frey, Mark <mfrey@chla.usc.edu>; Harry.Pothoulakis <hpot@ucla.edu>  
Subject: article approval

Dear Authors,

One condition from the journal is that I compile a document containing email-based approvals from each author. The only difference between this version and the revision version is the addition of author contribution and data availability statements.

Here is their exact wording:

"Please request agreement from all authors including additions and deletions, these can be collected in the following way:

Email your co-authors with the change, and ask them to reply to your email confirming that they agree to these changes. Once you have collected these replies, please combine all of the co-authors' email responses in one document and upload this file to your submission."

Thank you,

Rob

"Please request agreement from all authors including additions and deletions, these can be collected in the following way:

# 2. Kai Fang

RE: article approval

Fang, Kai <kifang@mednet.ucla.edu>  
Mon 11/29/2021 7:17 AM  
To: Rankin, Carl <crankin@mednet.ucla.edu>  
Dear Rob:

I agree the changes in the revised manuscript. Let me know if further information is needed.

Best regards,

Kai Fang

From: Rankin, Carl  
Sent: Saturday, November 27, 2021 9:22 AM  
To: ARTIN SOROOSH <asoroosh@ucla.edu>; Fang, Kai <kifang@mednet.ucla.edu>; jillmayhoffman@gmail.com <jillmayhoffman@gmail.com>; KaiMan.Law@kq.org <KaiMan.Law@kq.org>; Videlock, Elizabeth J. <Evidelock@mednet.ucla.edu>; allok97@gmail.com <allok97@gmail.com>; Jonathan.Zhao <jonathan.zhao2000@gmail.com>; Hamid, Sepehr <SHamidi@mednet.ucla.edu>; David.Padua <davidpadua@gmail.com>; Frey, Mark <mfrey@chla.usc.edu>; Harry.Pothoulakis <hpot@ucla.edu>  
Subject: article approval

Dear Authors,

One condition from the journal is that I compile a document containing email-based approvals from each author. The only difference between this version and the revision version is the addition of author contribution and data availability statements.

Here is their exact wording:

"Please request agreement from all authors including additions and deletions, these can be collected in the following way:

Email your co-authors with the change, and ask them to reply to your email confirming that they agree to these changes. Once you have collected these replies, please combine all of the co-authors' email responses in one document and upload this file to your submission."

Thank you,

Rob

# 3. Jill Hoffman

Re: article approval

J Hoffman <jhoffman@gmail.com>  
Sat 11/20/2021 9:40 AM  
To: Rankin, Carl <crankin@mednet.ucla.edu>  
CAUTION - EXTERNAL EMAIL: Do not click links or open attachments unless you recognize the sender.

Dear Rob,

Thank for sending me the most recent version of the paper. I have noted the additions made to the original manuscript and agree.

Thank you for the opportunity to be included in this work.

Best regards,

JHoffman

On Nov 30, 2021, at 09:28, Rankin, Carl <crankin@mednet.ucla.edu> wrote:

Dear Mrs. Harry, Jill and Mark

I want to say you over the weekend but indicated the figures so it was a really large email and Artin didn't get it. I wanted to send the manuscript to you to get your approval as the figures have not changed. See below remark from the journal.

Thank you

Rob

From: Rankin, Carl <crankin@mednet.ucla.edu>  
Date: Saturday, November 27, 2021 at 9:22 AM  
To: ARTIN SOROOSH <asoroosh@ucla.edu>; Fang, Kai <kifang@mednet.ucla.edu>; jillmayhoffman@gmail.com <jillmayhoffman@gmail.com>; KaiMan.Law@kq.org <KaiMan.Law@kq.org>; Videlock, Elizabeth J. <Evidelock@mednet.ucla.edu>; allok97@gmail.com <allok97@gmail.com>; Jonathan.Zhao <jonathan.zhao2000@gmail.com>; Hamid, Sepehr <SHamidi@mednet.ucla.edu>; David.Padua <davidpadua@gmail.com>; Frey, Mark <mfrey@chla.usc.edu>; Harry.Pothoulakis <hpot@ucla.edu>  
Subject: article approval

Dear Authors,

One condition from the journal is that I compile a document containing email-based approvals from each author. The only difference between this version and the revision version is the addition of author contribution and data availability statements.

Here is their exact wording:

"Please request agreement from all authors including additions and deletions, these can be collected in the following way:

Email your co-authors with the change, and ask them to reply to your email confirming that they agree to these changes. Once you have collected these replies, please combine all of the co-authors' email responses in one document and upload this file to your submission."

# 4. Ivy Law

Re: article approval

Ivy Law <iylawkai@gmail.com>  
Sat 11/20/2021 10:17 AM  
To: Rankin, Carl <crankin@mednet.ucla.edu>

CAUTION - EXTERNAL EMAIL: Do not click links or open attachments unless you recognize the sender.

Dear Robert,

Thanks for your email.

I agree to all changes made to this manuscript.

Kind regards,

Ivy

On Sat, Nov 27, 2021, 9:29 AM Rankin, Carl <crankin@mednet.ucla.edu> wrote:  
Dear Ivy,

One condition from the journal is that I compile a document containing email-based approvals from each author. The only difference between this version and the revision version is the addition of author contribution and data availability statements.

Here is their exact wording:

"Please request agreement from all authors including additions and deletions, these can be collected in the following way:

Email your co-authors with the change, and ask them to reply to your email confirming that they agree to these changes. Once you have collected these replies, please combine all of the co-authors' email responses in one document and upload this file to your submission."

Thank you,

Rob

UCLA HEALTH SCIENCES IMPORTANT WARNING: This email (and any attachments) is only intended for the use of the person or entity to which it is addressed, and may contain information that is privileged and confidential. You, the recipient, are obligated to maintain it in a safe, secure and confidential manner. Unauthorized disclosure or failure to maintain confidentiality may subject you to federal and state penalties. If you are not the intended recipient, please immediately notify us by return email, and delete this message from your computer.

# 5. Beth Videlock

Re: article approval

Videlock, Elizabeth J. <EVIDelock@mednet.ucla.edu>  
Mon 11/22/2021 9:04 AM  
To: Rankin, Carl <crankin@mednet.ucla.edu>  
I agree to the changes you have made.

Elizabeth Videlock, M.D., Ph.D.  
Assistant Professor  
Medical and Translational Division of Digestive Diseases  
David Geffen School of Medicine at UCLA  
MRB 279  
Office Phone: 424-327-4473  
Email: videlock@mednet.ucla.edu

From: Rankin, Carl <crankin@mednet.ucla.edu>  
Sent: Saturday, November 27, 2021 9:22 AM  
To: ARTIN SOROOSH <asoroosh@ucla.edu>; Fang, Kai <kifang@mednet.ucla.edu>; jillmayhoffman@gmail.com <jillmayhoffman@gmail.com>; KaiMan.Law@kq.org <KaiMan.Law@kq.org>; Videlock, Elizabeth J. <EVIDelock@mednet.ucla.edu>; allok97@gmail.com <allok97@gmail.com>; Jonathan.Zhao <jonathan.zhao2000@gmail.com>; Hamid, Sepehr <SHamidi@mednet.ucla.edu>; David.Padua <davidpadua@gmail.com>; Frey, Mark <mfrey@chla.usc.edu>; Harry.Pothoulakis <hpot@ucla.edu>  
Subject: article approval

Dear Authors,

One condition from the journal is that I compile a document containing email-based approvals from each author. The only difference between this version and the revision version is the addition of author contribution and data availability statements.

Here is their exact wording:

"Please request agreement from all authors including additions and deletions, these can be collected in the following way:

Email your co-authors with the change, and ask them to reply to your email confirming that they agree to these changes. Once you have collected these replies, please combine all of the co-authors' email responses in one document and upload this file to your submission."

Thank you,

Rob

# 6. Ali Lokhandwala

Re: article approval

Zulfiqar Ali Lokhandwala <allok97@gmail.com>  
Sat 11/20/2021 10:46 AM  
To: Rankin, Carl <crankin@mednet.ucla.edu>  
CAUTION - EXTERNAL EMAIL: Do not click links or open attachments unless you recognize the sender.

Hi Robert,

I agree to these changes on this manuscript, thank you for reaching out and best regards

Zulfiqar Ali Lokhandwala

On Sat, Nov 27, 2021 at 9:23 AM Rankin, Carl <crankin@mednet.ucla.edu> wrote:  
Dear Authors,

One condition from the journal is that I compile a document containing email-based approvals from each author. The only difference between this version and the revision version is the addition of author contribution and data availability statements.

Here is their exact wording:

"Please request agreement from all authors including additions and deletions, these can be collected in the following way:

Email your co-authors with the change, and ask them to reply to your email confirming that they agree to these changes. Once you have collected these replies, please combine all of the co-authors' email responses in one document and upload this file to your submission."

Thank you,

Rob

UCLA HEALTH SCIENCES IMPORTANT WARNING: This email (and any attachments) is only intended for the use of the person or entity to which it is addressed, and may contain information that is privileged and confidential. You, the recipient, are obligated to maintain it in a safe, secure and confidential manner. Unauthorized disclosure or failure to maintain confidentiality may subject you to federal and state penalties. If you are not the intended recipient, please immediately notify us by return email, and delete this message from your computer.

Zulfiqar Ali Lokhandwala (Author)  
EVIDelock@mednet.ucla.edu  
Oregon Health and Science University, School of Medicine  
ORHS-PRU | School of Public Health  
allok97@ohsu.edu | 503.302.8388

# 7. Jon Zhao

Re: article approval

Jonathan Zhao <jonathan.zhao2000@gmail.com>  
Sat 11/20/2021 9:11 PM  
To: Rankin, Carl <crankin@mednet.ucla.edu>

CAUTION - EXTERNAL EMAIL: Do not click links or open attachments unless you recognize the sender.

I agree to these changes.

On Sat, Nov 27, 2021 at 9:23 AM Rankin, Carl <crankin@mednet.ucla.edu> wrote:  
Dear Authors,

One condition from the journal is that I compile a document containing email-based approvals from each author. The only difference between this version and the revision version is the addition of author contribution and data availability statements.

Here is their exact wording:

"Please request agreement from all authors including additions and deletions, these can be collected in the following way:

Email your co-authors with the change, and ask them to reply to your email confirming that they agree to these changes. Once you have collected these replies, please combine all of the co-authors' email responses in one document and upload this file to your submission."

Thank you,

Rob

UCLA HEALTH SCIENCES IMPORTANT WARNING: This email (and any attachments) is only intended for the use of the person or entity to which it is addressed, and may contain information that is privileged and confidential. You, the recipient, are obligated to maintain it in a safe, secure and confidential manner. Unauthorized disclosure or failure to maintain confidentiality may subject you to federal and state penalties. If you are not the intended recipient, please immediately notify us by return email, and delete this message from your computer.

Jiankang Zhao  
University of California, Los Angeles  
Biology B.S. | Class of 2022  
Contact: | 408.996-4377

# 8. Sepehr Hamidi

Re: article approval

Hamidi, Sepehr <SHamidi@mednet.ucla.edu>  
Sat 11/20/2021 1:04 PM  
To: Rankin, Carl <crankin@mednet.ucla.edu>  
Dear Dr. Rankin,

I agree with the changes and the final version.

Thanks,  
Sepehr Hamidi

From: Rankin, Carl <crankin@mednet.ucla.edu>  
Sent: Saturday, November 27, 2021 9:22 AM  
To: ARTIN SOROOSH <asoroosh@ucla.edu>; Fang, Kai <kifang@mednet.ucla.edu>; jillmayhoffman@gmail.com <jillmayhoffman@gmail.com>; KaiMan.Law@kq.org <KaiMan.Law@kq.org>; Videlock, Elizabeth J. <EVIDelock@mednet.ucla.edu>; allok97@gmail.com <allok97@gmail.com>; Jonathan.Zhao <jonathan.zhao2000@gmail.com>; Hamid, Sepehr <SHamidi@mednet.ucla.edu>; David.Padua <davidpadua@gmail.com>; Frey, Mark <mfrey@chla.usc.edu>; Harry.Pothoulakis <hpot@ucla.edu>  
Subject: article approval

Dear Authors,

One condition from the journal is that I compile a document containing email-based approvals from each author. The only difference between this version and the revision version is the addition of author contribution and data availability statements.

Here is their exact wording:

"Please request agreement from all authors including additions and deletions, these can be collected in the following way:

Email your co-authors with the change, and ask them to reply to your email confirming that they agree to these changes. Once you have collected these replies, please combine all of the co-authors' email responses in one document and upload this file to your submission."

Thank you,

Rob

# 9. David Padua

Re: article approval

David Padua <davidpadua@gmail.com>  
Sat 11/20/2021 10:16 PM  
To: Rankin, Carl <crankin@mednet.ucla.edu>  
CAUTION - EXTERNAL EMAIL: Do not click links or open attachments unless you recognize the sender.

Approved

Sent from my iPhone

On Nov 27, 2021, at 9:23 AM, Rankin, Carl <crankin@mednet.ucla.edu> wrote:

Dear Authors,

One condition from the journal is that I compile a document containing email-based approvals from each author. The only difference between this version and the revision version is the addition of author contribution and data availability statements.

Here is their exact wording:

"Please request agreement from all authors including additions and deletions, these can be collected in the following way:

Email your co-authors with the change, and ask them to reply to your email confirming that they agree to these changes. Once you have collected these replies, please combine all of the co-authors' email responses in one document and upload this file to your submission."

Thank you,

Rob

UCLA HEALTH SCIENCES IMPORTANT WARNING: This email (and any attachments) is only intended for the use of the person or entity to which it is addressed, and may contain information that is privileged and confidential. You, the recipient, are obligated to maintain it in a safe, secure and confidential manner. Unauthorized disclosure or failure to maintain confidentiality may subject you to federal and state penalties. If you are not the intended recipient, please immediately notify us by return email, and delete this message from your computer.

David Padua  
-Supplemental Material.pdf-  
-Revision Figures.pdf-

# 10. Mark Frey

Re: article approval

Frey, Mark <mfrey@chla.usc.edu>  
Sat 11/20/2021 10:17 AM  
To: Rankin, Carl <crankin@mednet.ucla.edu>

I agree with the changes

Mark R. Frey, Ph.D.  
Associate Professor of Pediatrics and Biochemistry & Molecular Medicine  
The Saban Research Institute of Children's Hospital Los Angeles  
University of Southern California  
1600 N. Harbor Blvd., North Harbor Bldg. | Los Angeles, CA 90027  
Ph: 323.361.7241 | mrfrey@usc.edu

On Nov 30, 2021, at 8:28 AM, Rankin, Carl <crankin@mednet.ucla.edu> wrote:

CAUTION - BE CAREFUL WITH THIS MESSAGE  
This message and any attachments are confidential. Do not disseminate, distribute, or retransmit unless you are the intended recipient. If you are not the intended recipient, please notify the sender immediately by email. Do not click links or open attachments unless you recognize the sender.

Dear Artin, Harry, Jill and Mark

I sent this to you over the weekend but indicated the figures so it was a really large email and Artin didn't get it. I wanted to send the manuscript to you to get your approval as the figures have not changed. See below remark from the journal.

Thank you

Rob

From: Rankin, Carl <crankin@mednet.ucla.edu>  
Date: Saturday, November 27, 2021 at 9:22 AM  
To: ARTIN SOROOSH <asoroosh@ucla.edu>; Fang, Kai <kifang@mednet.ucla.edu>; jillmayhoffman@gmail.com <jillmayhoffman@gmail.com>; KaiMan.Law@kq.org <KaiMan.Law@kq.org>; Videlock, Elizabeth J. <EVIDelock@mednet.ucla.edu>; allok97@gmail.com <allok97@gmail.com>; Jonathan.Zhao <jonathan.zhao2000@gmail.com>; Hamid, Sepehr <SHamidi@mednet.ucla.edu>; David.Padua <davidpadua@gmail.com>; Frey, Mark <mfrey@chla.usc.edu>; Harry.Pothoulakis <hpot@ucla.edu>  
Subject: article approval

# 11. Harry Pothoulakis

Journal approval (rob rankin)

Harry Pothoulakis <hpot@ucla.edu>  
To: Robert Rankin <rankincr@gmail.com>

Hi Rob: first time I see this e mail.  
I have no problem with the change and I approve it.  
Best, Harry P

Sent from my iPhone

On Dec 1, 2021, at 4:46 PM, Robert Rankin <rankincr@gmail.com> wrote:

[Quoted text hidden]

# 12. Corresponding author
